# Supplementary material
Source: PubMed Central journal article supplement (PMC2954641)
Supplement: me.2010-0156_1.pdf [file me.2010-0156_1.pdf]

## SUPPLEMENTAL MATERIAL

**Supplemental Fig. 1.** A, Conserved region -3135/-2980 alone does not enhance GnRH expression. Transient transfections were performed in GT1-7 cells using luciferase reporter plasmids containing -3135/-2980 upstream of GnRH-P or GnRH-E1/GnRH-P as indicated in schematic diagrams. Data represent luciferase/ $\beta$ -galactosidase values normalized to RSVe/RSVp-luc and are shown as mean  $\pm$  SD. \*, significantly different from GnRH-P by one-way ANOVA and post-hoc Tukey Kramer HSD ( $P < 0.05$ ). B and C, Redundancy within the -3135/-2980 region. B, Transient transfections were performed in GT1-7 cells using luciferase reporter plasmids containing portions of the -3135/-2980 region of GnRH-E2 on GnRH-P. Previously characterized region -2980/-2631 is colored in gray, -3135/-2980 is colored in white. Positions of subregions studied are left of schematic diagrams. Data represent luciferase/ $\beta$ -galactosidase values normalized to empty pGL3 vector and are shown as mean  $\pm$  SD. Levels not assigned the same letter are significantly different by one-way ANOVA and by post-hoc Tukey-Kramer HSD ( $P < 0.05$ ). C, Transient transfections were performed in GT1-7 cells using luciferase reporter plasmids containing portions of the -3135/-2980 region of GnRH-E2 upstream of GnRH-E1/RSVp. Data represent luciferase/ $\beta$ -galactosidase values normalized to RSVp and are shown as mean  $\pm$  SD. Levels not assigned the same letter are significantly different by one-way ANOVA and by post-hoc Tukey-Kramer HSD ( $P < 0.05$ ).

Supplemental Figure 1

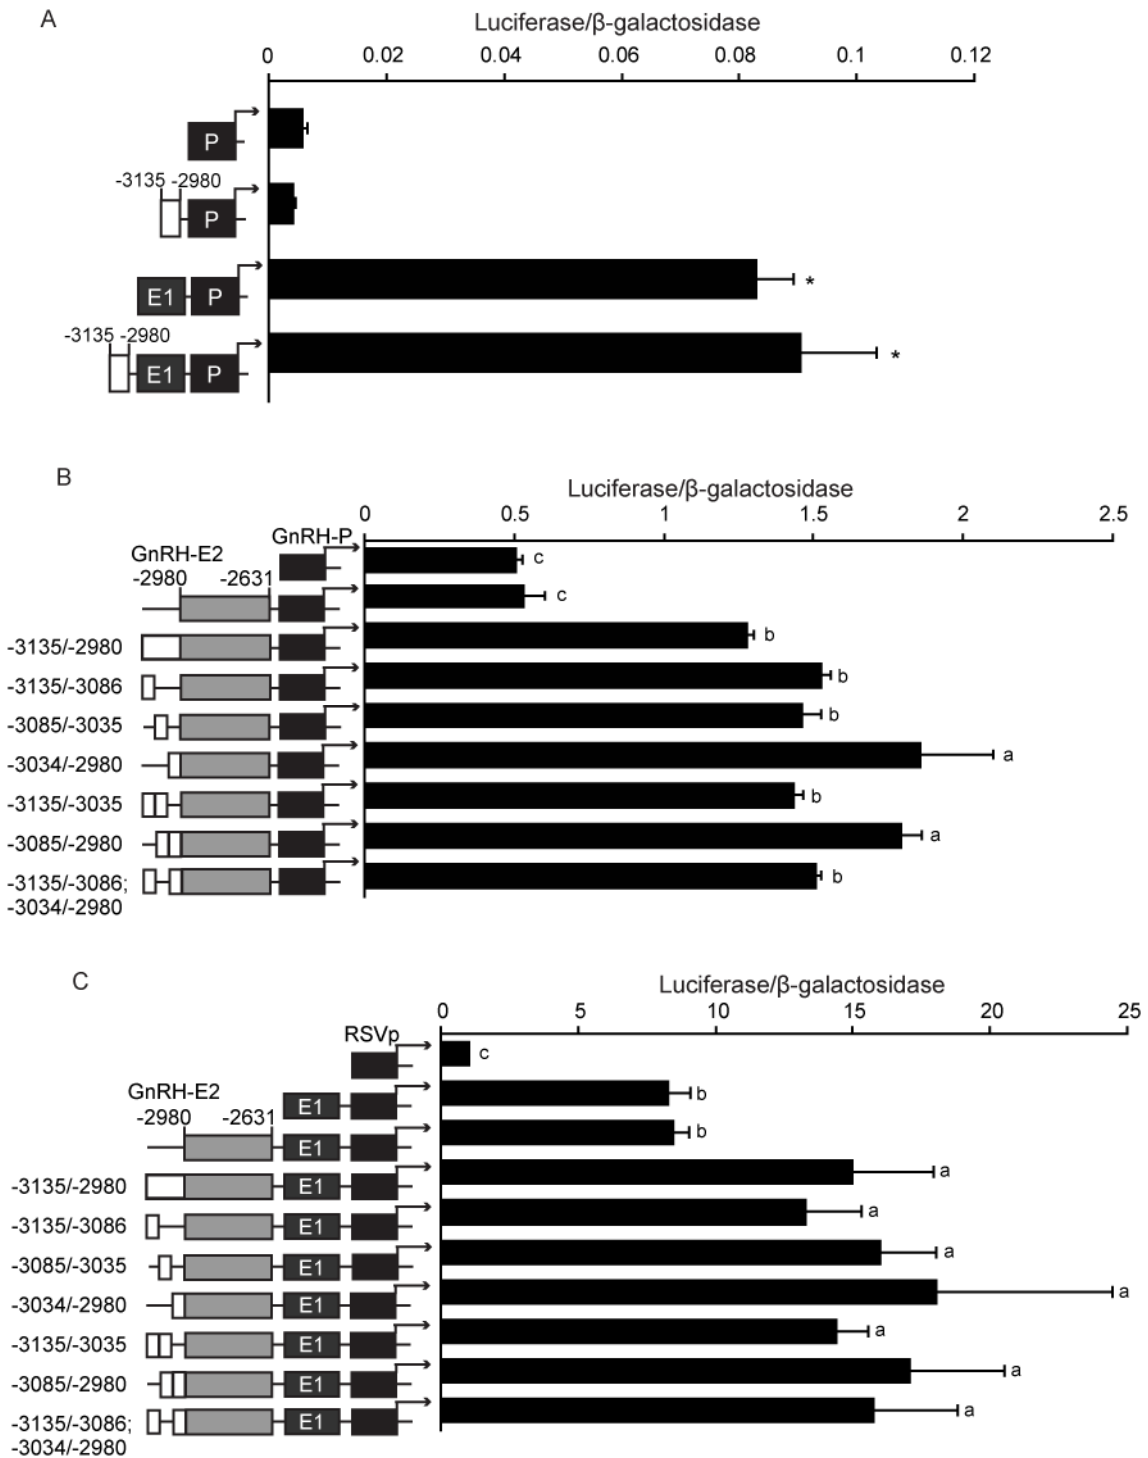

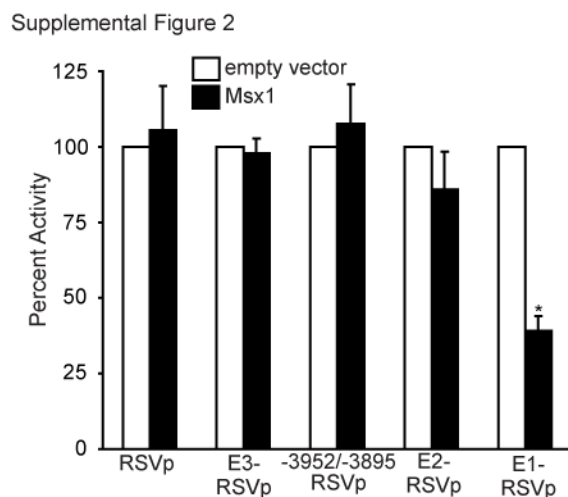

**Supplemental Fig. 2.** Msx1 does not change GnRH-E2 or GnRH-E3 expression. Luciferase reporters with RSVp alone, or with GnRH-E3, the GnRH-E3 critical region (-3952/-3895), GnRH-E2, or GnRH-E1 on RSVp were co-transfected into GT1-7 cells with either empty or Msx1 expression plasmid. Data are presented as percent luciferase/ $\beta$ -galactosidase activity is relative to empty expression vector control, mean  $\pm$  SD. \*, significantly different from empty expression vector control by Student's t test.

**Supplemental Table 1: ChIP and EMSA Oligonucleotide Primer Sequences**

| Name/Region            | Location                       | *      | Sequence                                                            |
|------------------------|--------------------------------|--------|---------------------------------------------------------------------|
| ChIP<br>mGnRH-P        | Genomic (mouse)<br>-173/+53    | F<br>R | CAGCAGGTGTTGCAATTACATTCACCATTAAG<br>CCTGTTTGGATGTGAAAGTCAAAGGGATCTC |
| ChIP<br>mGnRH-E1       | Genomic (mouse)<br>-1814/-1653 | F<br>R | GCCAAACACCACAGTCTTCTCTTGAGTGAC<br>CTGGCACAAAGAGCAAAGAACCTCCTCTC     |
| ChIP<br>mGnRH-E2       | Genomic (mouse)<br>-3579/-3427 | F<br>R | CTACAGGCTGGTCGGCTTGAGGCAGTGAATC<br>TGCTCTCCTCCCCATGTAAGCCCTTACTGTG  |
| ChIP<br>mGnRH-E3       | Genomic (mouse)<br>-4706/-4533 | F<br>R | TTCCCCTCATTGGGACTGTAACAGAAGGAC<br>TTGAACCAAGATGGCACTTCCACACAATGC    |
| ChIP<br>mGnRH-Intron 3 | Genomic (mouse)<br>+3623/+3820 | F<br>R | CGGTGACTTCAATTTCCACACCCAATGGAC<br>CATTAGCCGCGTAAAGGATGACGCTGTGAG    |
| EMSA**<br>-3927        | Genomic (rat)<br>-3927/-3903   | F      | TGTTCGGGTTTATAAATAGCTTTAG                                           |
| EMSA<br>-3927 m1       | Genomic (rat)<br>-3927/-3903   | F      | <u>TGGCGGGTTTATAAATAGCTTTAG</u>                                     |
| EMSA<br>-3927 m2       | Genomic (rat)<br>-3927/-3903   | F      | TGTTATTTTTTATAAATAGCTTTAG                                           |
| EMSA<br>-3927 m3       | Genomic (rat)<br>-3927/-3903   | F      | TGTTCGGG <u>CCGCT</u> AATAGCTTTAG                                   |
| EMSA<br>-3927 m4       | Genomic (rat)<br>-3927/-3903   | F      | TGTTCGGGTTTAG <u>CCCT</u> AGCTTTAG                                  |
| EMSA<br>-3927 m5       | Genomic (rat)<br>-3927/-3903   | F      | TGTTCGGGTTTATAA <u>AGCT</u> ATTTAG                                  |
| EMSA<br>-3927 m6       | Genomic (rat)<br>-3927/-3903   | F      | TGTTCGGGTTTATAAATAG <u>CGGGCT</u>                                   |
| EMSA<br>-3927 mutAT    | Genomic (rat)<br>-3927/-3903   | F      | TGTTCGGGTT <u>GCGCCCG</u> AGCTTTAG                                  |
| EMSA<br>-2913          | Genomic (rat)<br>-2913/-2889   | F      | TTTTGAAAATGAATTATTTTCTTTG                                           |
| EMSA<br>-2913 mOct     | Genomic (rat)<br>-2913/-2889   | F      | TTTTGAAAC <u>CGTCCGGCT</u> TTTCTTTG                                 |
| EMSA<br>-2913 m4a      | Genomic (rat)<br>-2913/-2889   | F      | TTTTGAAAC <u>CGT</u> CATTATTTTCTTTG                                 |
| EMSA<br>-2913 m4b      | Genomic (rat)<br>-2913/-2889   | F      | TTTTGAAAATGAC <u>GGCT</u> TTTCTTTG                                  |

\* F indicates forward primer and R indicates reverse primer

\*\* Only top strand (sense) is shown; mutations are underlined
